# Supplementary material
Source: publisher figshare collection journal article supplement (https://brill.figshare.com/ndownloader/files/36476469)
Supplement: Supplementary file 1 [file 36476469]

## Sheet: Supplementary Table S6
Included in this study	Subfamily	Tribe	Genus	Species	Author	Year	Remarks
	Acentropinae		Diathraustodes	amoenialis	(Christoph)	1881	Spilomelinae, in Japan
〇	Lathrotelinae		Acropentias	aurea	(Butler)	1878
	Lathrotelinae		Diplopseustis	perieresalis	(Walker)	1859
	Lathrotelinae		Sufetula	minuscula	Inoue	1996
〇	Lathrotelinae		Sufetula	sunidesalis	Walker	1859
	Pyraustinae	Portentmorphini	Hyalobathra	coenostolalis	(Snellen)	1980
	Pyraustinae	Portentmorphini	Hyalobathra	dialychna	Meyrick	1894
〇	Pyraustinae	Portentmorphini	Hyalobathra	illectalis	(Walker)	1859
〇	Pyraustinae	Portentmorphini	Hyalobathra	undulinea	(Hampson)	1891
〇	Pyraustinae	Portentmorphini	Mabura	eryxalis	(Walker)	1859
〇	Pyraustinae	Pyraustini	Aglaops	albipennis	(Inoue)	2000	misplaced in Aglaops
〇	Pyraustinae	Pyraustini	Aglaops	aurantialis	(Munroe & Mutuura)	1968
〇	Pyraustinae	Pyraustini	Aglaops	genialis	(Leech)	1889
	Pyraustinae	Pyraustini	Aglaops	pseudocrocealis	(South)	1901
〇	Pyraustinae	Pyraustini	Anania	albeoverbascalis	Yamanaka	1966
	Pyraustinae	Pyraustini	Anania	coronata	(Hufnagel)	1767
〇	Pyraustinae	Pyraustini	Anania	delicatalis	(South)	1901
	Pyraustinae	Pyraustini	Anania	egentalis	(Christoph)	1881
〇	Pyraustinae	Pyraustini	Anania	funebris	(Ström)	1768
	Pyraustinae	Pyraustini	Anania	fuscalis	(Denis & Schiffermüller)	1775
〇	Pyraustinae	Pyraustini	Anania	hortulata	(Linnaeus)	1758
〇	Pyraustinae	Pyraustini	Anania	lancealis	(Denis & Schiffermüller)	1775
〇	Pyraustinae	Pyraustini	Anania	luctualis	(Hübner)	1796
	Pyraustinae	Pyraustini	Anania	miyanoi	Yamanaka	2015
	Pyraustinae	Pyraustini	Anania	obtusalis	(Yamanaka)	1987
〇	Pyraustinae	Pyraustini	Anania	ocellalis	(Warren)	1892
	Pyraustinae	Pyraustini	Anania	perfuscalis	(Munroe & Mutuura)	1969
	Pyraustinae	Pyraustini	Anania	perlucidalis	(Hübner)	[1809]
〇	Pyraustinae	Pyraustini	Anania	stachydalis	(Germar)	1821
	Pyraustinae	Pyraustini	Anania	syneilesidis	Yoshiyasu & Sakakibara	2014
	Pyraustinae	Pyraustini	Anania	terrealis	(Treitschke)	1829
〇	Pyraustinae	Pyraustini	Anania	verbascalis	(Denis & Schiffermüller)	1775
〇	Pyraustinae	Pyraustini	Anania	vicinalis	(South)	1901
	Pyraustinae	Pyraustini	Callibotys	wilemani	Munroe & Mutuura	1969
〇	Pyraustinae	Pyraustini	Circobotys	aurealis	(Leech)	1889
	Pyraustinae	Pyraustini	Circobotys	cryptica	Munroe & Mutuura	1969
〇	Pyraustinae	Pyraustini	Circobotys	heterogenalis	(Bremer)	1864
〇	Pyraustinae	Pyraustini	Circobotys	nycterina	Butler	1879
	Pyraustinae	Pyraustini	Circobotys	uniformis	(Hampson)	1913
	Pyraustinae	Pyraustini	Crypsiptya	coclesalis	(Walker)	1859
〇	Pyraustinae	Pyraustini	Demobotys	pervulgalis	(Hampson)	1913
〇	Pyraustinae	Pyraustini	Ecpyrrhorrhoe	minnehaha	(Pryer)	1877
〇	Pyraustinae	Pyraustini	Ecpyrrhorrhoe	puralis	(South)	1901
〇	Pyraustinae	Pyraustini	Ecpyrrhorrhoe	rubiginalis	(Hübner)	[1796]
〇	Pyraustinae	Pyraustini	Loxostege	aeruginalis	(Hübner)	[1796]
〇	Pyraustinae	Pyraustini	Loxostege	sticticalis	(Linnaeus)	1761
	Pyraustinae	Pyraustini	Loxostege	turbidalis	(Treitschke)	1829
〇	Pyraustinae	Pyraustini	Nascia	cilialis	(Hübner)	[1796]
〇	Pyraustinae	Pyraustini	Nomis	albopedalis	Motschulsky	1861
〇	Pyraustinae	Pyraustini	Pagyda	arbiter	(Butler)	1879
	Pyraustinae	Pyraustini	Pagyda	citrinella	Inoue	1996
〇	Pyraustinae	Pyraustini	Pagyda	quadrilineata	Butler	1881
〇	Pyraustinae	Pyraustini	Pagyda	quinquelineata	Hering	1903
〇	Pyraustinae	Pyraustini	Paranomis	sidemialis	Munroe & Mutuura	1968
〇	Pyraustinae	Pyraustini	Paratalanta	cultralis	(Staudinger)	1867
〇	Pyraustinae	Pyraustini	Paratalanta	pandalis	(Hübner)	1825
〇	Pyraustinae	Pyraustini	Paratalanta	taiwanensis	Yamanaka	1972
	Pyraustinae	Pyraustini	Paratalanta	ussurialis	(Bremer)	1864
〇	Pyraustinae	Pyraustini	Prodasycnemis	inornata	(Butler)	1879
	Pyraustinae	Pyraustini	Prooedema	inscisale	(Walker)	1866
	Pyraustinae	Pyraustini	Psammotis	orientalis	Munroe & Mutuura	1968
〇	Pyraustinae	Pyraustini	Pyrausta	aurata	(Scopoli)	1763
	Pyraustinae	Pyraustini	Pyrausta	chrysitis	Butler	1881
	Pyraustinae	Pyraustini	Pyrausta	cingulata	(Linnaeus)	1758
〇	Pyraustinae	Pyraustini	Pyrausta	contigualis	South	1901
	Pyraustinae	Pyraustini	Pyrausta	fuliginata	Yamanaka	1978
	Pyraustinae	Pyraustini	Pyrausta	inornatalis	(Fernald)	1885
〇	Pyraustinae	Pyraustini	Pyrausta	limbata	(Butler)	1879
〇	Pyraustinae	Pyraustini	Pyrausta	mutuurai	Inoue	1982
	Pyraustinae	Pyraustini	Pyrausta	neocespitalis	Inoue	1982
〇	Pyraustinae	Pyraustini	Pyrausta	panopealis	(Walker)	1859
	Pyraustinae	Pyraustini	Pyrausta	pullatalis	(Christoph)	1881
〇	Pyraustinae	Pyraustini	Pyrausta	simplicealis	(Bremer)	1864
	Pyraustinae	Pyraustini	Pyrausta	tithonialis	Zeller	1872
〇	Pyraustinae	Pyraustini	Pyrausta	unipunctata	Butler	1881
〇	Pyraustinae	Pyraustini	Sclerocona	acutella	(Eversmann)	1842
	Pyraustinae	Pyraustini	Sinibotys	butleri	(South)	1901
〇	Pyraustinae	Pyraustini	Sitochroa	palealis	(Denis & Schiffermüller)	1775
〇	Pyraustinae	Pyraustini	Sitochroa	umbrosalis	(Warren)	1892
〇	Pyraustinae	Pyraustini	Sitochroa	verticalis	(Linnaeus)	1758
〇	Pyraustinae	Pyraustini	Torulisquama	evenoralis	(Walker)	1859
	Pyraustinae	Pyraustini	Torulisquama	obliquilinealis	(Inoue)	1982
〇	Pyraustinae	Pyraustini	Yezobotys	dissimilis	(Yamanaka)	1958
〇	Pyraustinae	unplaced	Aurorobotys	aurorina	(Butler)	1878
〇	Pyraustinae	unplaced	Carminibotys	carminalis	(Caradja)	1925
〇	Pyraustinae	unplaced	Chobera	amamiale	(Munroe & Mutuura)	1968
〇	Pyraustinae	unplaced	Lamprophaia	albifimbrialis	(Walker)	[1866]
〇	Pyraustinae	unplaced	Ostrinia	furnacalis	(Guenée)	1854
〇	Pyraustinae	unplaced	Ostrinia	latipennis	(Warren)	1892
〇	Pyraustinae	unplaced	Ostrinia	orientalis	Mutuura & Munroe	1970
	Pyraustinae	unplaced	Ostrinia	ovalipennis	Ohno	2003
	Pyraustinae	unplaced	Ostrinia	palustralis	(Hübner)	[1796]
	Pyraustinae	unplaced	Ostrinia	quadripunctalis	(Denis & Schiffermüller)	1775
	Pyraustinae	unplaced	Ostrinia	sanguinealis	(Warren)	1892
〇	Pyraustinae	unplaced	Ostrinia	scapulalis	(Walker)	1859
〇	Pyraustinae	unplaced	Ostrinia	sp. of Yoshiyasu, 2011
〇	Pyraustinae	unplaced	Ostrinia	zaguliaevi	Mutuura & Munroe	1970
〇	Pyraustinae	unplaced	Ostrinia	zealis	(Guenée)	1854
〇	Pyraustinae	unplaced	Tetridia	caletoralis	(Walker)	1859
	Pyraustinae	unplaced	Uresiphita	polygonalis	(Denis & Schiffermüller)	1775
〇	Pyraustinae	unplaced	Uresiphita	prunipennis	(Butler)	1879
	Spilomelinae	Agrotelini	Aetholix	flavibasalis	(Guenée)	1854
	Spilomelinae	Agrotelini	Agrotera	basinotata	Hampson	1891
	Spilomelinae	Agrotelini	Agrotera	flavobasalis	Inoue	1996
〇	Spilomelinae	Agrotelini	Agrotera	nemoralis	(Scopoli)	1763
	Spilomelinae	Agrotelini	Agrotera	posticalis	Wileman	1911
	Spilomelinae	Agrotelini	Haritalodes	angustalis	Yamanaka	2008
〇	Spilomelinae	Agrotelini	Haritalodes	basipunctalis	(Bremer)	1864
〇	Spilomelinae	Agrotelini	Haritalodes	derogatus	(Fabricius)	1775
〇	Spilomelinae	Agrotelini	Lygropia	yerburii	(Butler)	1886	misplaced in Lygropia
〇	Spilomelinae	Agrotelini	Nagiella	inferior	(Hampson)	1898
〇	Spilomelinae	Agrotelini	Nagiella	quadrimaculalis	(Kollar)	[1844]
〇	Spilomelinae	Agrotelini	Nagiella	tristalis	Matsui & Naka	2021
	Spilomelinae	Agrotelini	Nosophora	euryterminalis	(Hampson)	1918
	Spilomelinae	Agrotelini	Nosophora	insignis	(Butler)	1881
〇	Spilomelinae	Agrotelini	Nosophora	maculalis	(Leech)	1889
〇	Spilomelinae	Agrotelini	Nosophora	semitritalis	Lederer	1863
	Spilomelinae	Agrotelini	Nosophora	sp. of Sasaki & Yamanaka, 2013
	Spilomelinae	Agrotelini	Notarcha	quaternalis	(Zeller)	1852
〇	Spilomelinae	Agrotelini	Paranacoleia	lophophoralis	(Hampson)	1912
〇	Spilomelinae	Agrotelini	Patania	balteata	(Fabricius)	1798
〇	Spilomelinae	Agrotelini	Patania	brevipennis	(Inoue)	1982
〇	Spilomelinae	Agrotelini	Patania	characteristica	(Warren)	1896	misplaced in Patania
〇	Spilomelinae	Agrotelini	Patania	chlorophanta	(Butler)	1878
〇	Spilomelinae	Agrotelini	Patania	deficiens	(Moore)	1887	misplaced in Patania
〇	Spilomelinae	Agrotelini	Patania	expictalis	(Christoph)	1881	misplaced in Patania
〇	Spilomelinae	Agrotelini	Patania	harutai	(Inoue)	1955
	Spilomelinae	Agrotelini	Patania	iopasalis	(Walker)	1859	misplaced in Patania
〇	Spilomelinae	Agrotelini	Patania	plagiatalis	(Walker)	1859	misplaced in Patania
〇	Spilomelinae	Agrotelini	Patania	punctimarginalis	(Hampson)	1896
〇	Spilomelinae	Agrotelini	Patania	ruralis	(Scopoli)	1763
〇	Spilomelinae	Agrotelini	Patania	sabinusalis	(Walker)	1859
〇	Spilomelinae	Agrotelini	Patania	scinisalis	(Walker)	1859
〇	Spilomelinae	Agrotelini	Patania	ultimalis	(Walker)	1859	misplaced in Patania
〇	Spilomelinae	Agrotelini	Patania	verecunda	(Warren)	1896
〇	Spilomelinae	Herpetogrammatini	Eurrhyparodes	bracteolalis	Zeller	1852	requires consideration
	Spilomelinae	Herpetogrammatini	Eurrhyparodes	sp. of Sasaki & Yamanaka, 2013
	Spilomelinae	Herpetogrammatini	Eurrhyparodes	sp. of Yanagita & Nakajima, 1999
	Spilomelinae	Herpetogrammatini	Eurrhyparodes	tricoloralis	(Zeller)	1852
	Spilomelinae	Herpetogrammatini	Herpetogramma	basale	(Walker)	[1866]
	Spilomelinae	Herpetogrammatini	Herpetogramma	cynarale	(Walker)	1859
〇	Spilomelinae	Herpetogrammatini	Herpetogramma	fuscescens	(Warren)	1892
〇	Spilomelinae	Herpetogrammatini	Herpetogramma	licarsisale	(Walker)	1859
〇	Spilomelinae	Herpetogrammatini	Herpetogramma	luctuosale	(Guenée)	1854	misplaced in Herpetogramma
	Spilomelinae	Herpetogrammatini	Herpetogramma	magnum	(Butler)	1879
〇	Spilomelinae	Herpetogrammatini	Herpetogramma	moderatale	(Christoph)	1881
	Spilomelinae	Herpetogrammatini	Herpetogramma	ochrimaculale	(South)	1901
	Spilomelinae	Herpetogrammatini	Herpetogramma	ochrotinctale	Inoue	1982
	Spilomelinae	Herpetogrammatini	Herpetogramma	okamotoi	Yamanaka	1976
	Spilomelinae	Herpetogrammatini	Herpetogramma	pacificale	(Hampson)	1912
〇	Spilomelinae	Herpetogrammatini	Herpetogramma	phaeopterale	(Guenée)	1854
	Spilomelinae	Herpetogrammatini	Herpetogramma	pseudomagnum	Yamanaka	1976
〇	Spilomelinae	Herpetogrammatini	Herpetogramma	rude	(Warren)	1892
	Spilomelinae	Herpetogrammatini	Herpetogramma	sp. of Doi, 2005
	Spilomelinae	Herpetogrammatini	Herpetogramma	stultale	(Walker)	1859
〇	Spilomelinae	Herpetogrammatini	Herpetogramma	submarginale	(Swinhoe)	1901
	Spilomelinae	Herpetogrammatini	Herpetogramma	tominagai	Yamanaka	2003
	Spilomelinae	Herpetogrammatini	Herpetogramma	yaeyamense	Yamanaka	2003
〇	Spilomelinae	Herpetogrammatini	Metoeca	foedalis	(Guenée)	1854
	Spilomelinae	Hydririni	Hydriris	chalybitis	Meyrick	1885
〇	Spilomelinae	Hydririni	Hydriris	ornatalis	(Duponchel)	1832
〇	Spilomelinae	Hymeniini	Hymenia	perspectalis	(Hübner)	[1796]
〇	Spilomelinae	Hymeniini	Spoladea	recurvalis	(Fabricius)	1775
	Spilomelinae	Lineodini	Leucinodes	orbonalis	Guenée	1854
	Spilomelinae	Margaroniini	Agathodes	ostentalis	(Geyer)	1837
〇	Spilomelinae	Margaroniini	Agrioglypta	eurytusalis	(Walker)	1859
	Spilomelinae	Margaroniini	Agrioglypta	fulguralis	Rosfiansyah, Yagi & Hirowatari	2021
〇	Spilomelinae	Margaroniini	Agrioglypta	itysalis	(Walker)	1859
〇	Spilomelinae	Margaroniini	Analyta	apicalis	(Hampson)	1896
	Spilomelinae	Margaroniini	Antigastra	catalaunalis	(Duponchel)	1833
	Spilomelinae	Margaroniini	Botyodes	asialis	Guenée	1854
〇	Spilomelinae	Margaroniini	Botyodes	diniasalis	(Walker)	1859
〇	Spilomelinae	Margaroniini	Botyodes	principalis	Leech	1889
〇	Spilomelinae	Margaroniini	Caldubotys	caldusalis	(Walker)	1859
〇	Spilomelinae	Margaroniini	Charitoprepes	lubricosa	Warren	1896
	Spilomelinae	Margaroniini	Cirrhochrista	brizoalis	(Walker)	1859
〇	Spilomelinae	Margaroniini	Cirrhochrista	kosemponialis	Strand	1919
	Spilomelinae	Margaroniini	Cirrhochrista	spissalis	(Guenée)	1854
	Spilomelinae	Margaroniini	Conogethes	parvipunctalis	Inoue & Yamanaka	2006
	Spilomelinae	Margaroniini	Conogethes	pinicolalis	Inoue & Yamanaka	2006
〇	Spilomelinae	Margaroniini	Conogethes	punctiferalis	(Guenée)	1854
〇	Spilomelinae	Margaroniini	Cydalima	perspectalis	(Walker)	1859
〇	Spilomelinae	Margaroniini	Diaphania	indica	(Saunders)	1851
	Spilomelinae	Margaroniini	Dysallacta	negatalis	(Walker)	1859
	Spilomelinae	Margaroniini	Filodes	fulvidorsalis	(Geyer)	1832
〇	Spilomelinae	Margaroniini	Glauconoe	deductalis	(Walker)	1859
〇	Spilomelinae	Margaroniini	Glyphodes	actorionalis	Walker	1859
	Spilomelinae	Margaroniini	Glyphodes	bipunctalis	Leech	1889
〇	Spilomelinae	Margaroniini	Glyphodes	bivitralis	Guenée	1854
	Spilomelinae	Margaroniini	Glyphodes	crithealis	(Walker)	1859
〇	Spilomelinae	Margaroniini	Glyphodes	duplicalis	Inoue, Munroe & Mutuura	1981
	Spilomelinae	Margaroniini	Glyphodes	fenestratus	Inoue	1996
	Spilomelinae	Margaroniini	Glyphodes	formosanus	Shibuya	1928
〇	Spilomelinae	Margaroniini	Glyphodes	multilinealis	Kenrick	1907
〇	Spilomelinae	Margaroniini	Glyphodes	onychinalis	(Guenée)	1854
〇	Spilomelinae	Margaroniini	Glyphodes	pryeri	Butler	1879
	Spilomelinae	Margaroniini	Glyphodes	pulverulentalis	Hampson	1896
〇	Spilomelinae	Margaroniini	Glyphodes	pyloalis	Walker	1859
〇	Spilomelinae	Margaroniini	Glyphodes	quadrimaculalis	(Bremer & Grey)	1853
	Spilomelinae	Margaroniini	Glyphodes	sp. of Yamanaka, 2013
〇	Spilomelinae	Margaroniini	Glyphodes	stolalis	Guenée	1854
	Spilomelinae	Margaroniini	Hodebertia	testalis	(Fabricius)	1794
〇	Spilomelinae	Margaroniini	Maruca	amboinalis	(Felder & Rogenhofer)	1875
〇	Spilomelinae	Margaroniini	Maruca	vitrata	(Fabricius)	1787
	Spilomelinae	Margaroniini	Nausinoe	perspectata	(Fabricius)	1775
〇	Spilomelinae	Margaroniini	Nevrina	procopia	(Stoll)	1781
〇	Spilomelinae	Margaroniini	Omiodes	decisalis	(Walker)	[1866]
〇	Spilomelinae	Margaroniini	Omiodes	diemenalis	(Guenée)	1854
〇	Spilomelinae	Margaroniini	Omiodes	indicata	(Fabricius)	1775
〇	Spilomelinae	Margaroniini	Omiodes	indistincta	(Warren)	1892
〇	Spilomelinae	Margaroniini	Omiodes	misera	(Butler)	1879
〇	Spilomelinae	Margaroniini	Omiodes	nipponalis	Yamanaka	2005
〇	Spilomelinae	Margaroniini	Omiodes	noctescens	(Moore)	1888
	Spilomelinae	Margaroniini	Omiodes	similis	(Moore)	[1885]
	Spilomelinae	Margaroniini	Omiodes	tristrialis	(Bremer)	1864
〇	Spilomelinae	Margaroniini	Omphisa	anastomosalis	(Guenée)	1854
〇	Spilomelinae	Margaroniini	Pachynoa	sabelialis	(Guenée)	1854
	Spilomelinae	Margaroniini	Palpita	homalia	Inoue	1996
〇	Spilomelinae	Margaroniini	Palpita	inusitata	(Butler)	1879
	Spilomelinae	Margaroniini	Palpita	munroei	Inoue	1996
〇	Spilomelinae	Margaroniini	Palpita	nigropunctalis	(Bremer)	1864
	Spilomelinae	Margaroniini	Palpita	pajnii	Kirti & Rose	1992
	Spilomelinae	Margaroniini	Parotis	marginata	(Hampson)	1893
	Spilomelinae	Margaroniini	Parotis	ogasawarensis	(Shibuya)	1929
	Spilomelinae	Margaroniini	Parotis	suralis	(Lederer)	1863
〇	Spilomelinae	Margaroniini	Polythlipta	liquidalis	Leech	1889
〇	Spilomelinae	Margaroniini	Pygospila	tyres	(Cramer)	1780
〇	Spilomelinae	Margaroniini	Sinomphisa	plagialis	(Wileman)	1911
〇	Spilomelinae	Margaroniini	Talanga	nympha	(Butler)	1880
	Spilomelinae	Margaroniini	Terastia	subjectalis	Lederer	1863
	Spilomelinae	Margaroniini	Tyspanodes	gracilis	Inoue	1982
〇	Spilomelinae	Margaroniini	Tyspanodes	striatus	(Butler)	1879
	Spilomelinae	Nomophilini	Ategumia	adipalis	(Lederer)	1863
	Spilomelinae	Nomophilini	Bocchoris	albipunctalis	Shibuya	1929
〇	Spilomelinae	Nomophilini	Bocchoris	inspersalis	(Zeller)	1852
〇	Spilomelinae	Nomophilini	Diasemia	accalis	(Walker)	1859
〇	Spilomelinae	Nomophilini	Diasemia	reticularis	(Linnaeus)	1761
〇	Spilomelinae	Nomophilini	Diasemiopsis	ramburialis	(Duponchel)	1834
	Spilomelinae	Nomophilini	Diathrausta	brevifascialis	(Wileman)	1911
	Spilomelinae	Nomophilini	Diathrausta	profundalis	Lederer	1863
〇	Spilomelinae	Nomophilini	Mecyna	flavalis	(Denis & Schiffermüller)	1775
	Spilomelinae	Nomophilini	Mecyna	fusei	Inoue	1982
〇	Spilomelinae	Nomophilini	Mecyna	gracilis	(Butler)	1879
〇	Spilomelinae	Nomophilini	Mecyna	suffusalis	(Warren)	1892
〇	Spilomelinae	Nomophilini	Mecyna	tricolor	(Butler)	1879	misplaced in Mecyna
〇	Spilomelinae	Nomophilini	Nomophila	noctuella	(Denis & Schiffermüller)	1775
〇	Spilomelinae	Nomophilini	Protonoceras	capitale	(Fabricius)	1794
	Spilomelinae	Nomophilini	Sameodes	abstrusalis	(Moore)	1888
	Spilomelinae	Nomophilini	Sameodes	aptalis	(Walker)	[1866]
〇	Spilomelinae	Nomophilini	Sameodes	cancellalis	(Zeller)	1852
	Spilomelinae	Nomophilini	Syngamia	falsidicalis	(Walker)	1859
〇	Spilomelinae	Spilomelini	Aethaloessa	calidalis	(Guenée)	1854
〇	Spilomelinae	Spilomelini	Ceratarcha	umbrosa	Swinhoe	1894
〇	Spilomelinae	Spilomelini	Cnaphalocrocis	medinalis	(Guenée)	1854
	Spilomelinae	Spilomelini	Cnaphalocrocis	pilosa	(Warren)	1896
〇	Spilomelinae	Spilomelini	Cnaphalocrocis	stereogona	(Meyrick)	1886
	Spilomelinae	Spilomelini	Marasmia	exigua	(Butler)	1879
〇	Spilomelinae	Spilomelini	Marasmia	poeyalis	(Boisduval)	1833
	Spilomelinae	Spilomelini	Marasmia	trapezalis	(Guenée)	1854
〇	Spilomelinae	Spilomelini	Massepha	ohbai	Yoshiyasu	1990
〇	Spilomelinae	Spilomelini	Orphanostigma	abruptalis	(Walker)	1859
	Spilomelinae	Steniini	Bradina	angustalis	Yamanaka	1984
〇	Spilomelinae	Steniini	Bradina	atopalis	(Walker)	1859
〇	Spilomelinae	Steniini	Bradina	erilitoides	Strand	1919
	Spilomelinae	Steniini	Bradina	geminalis	Caradja	1927
	Spilomelinae	Steniini	Bradina	trigonalis	Yamanaka	1984
〇	Spilomelinae	Steniini	Camptomastix	hisbonalis	(Walker)	1859
〇	Spilomelinae	Steniini	Camptomastix	septentrionalis	Inoue	1982
	Spilomelinae	Steniini	Dolicharthria	bilineatella	(Inoue)	1996
〇	Spilomelinae	Steniini	Dolicharthria	charonialis	(Walker)	1859
	Spilomelinae	Steniini	Dolicharthria	nigriscripta	Swinhoe	1895
	Spilomelinae	Steniini	Duponchelia	naitoi	Sasaki	2008	misplaced in Duponchelia?
〇	Spilomelinae	Steniini	Glycythyma	chrysorycta	(Meyrick)	1884
	Spilomelinae	Steniini	Hymenoptychis	sordida	Zeller	1852
〇	Spilomelinae	Steniini	Metasia	coniotalis	Hampson	1903
	Spilomelinae	Steniini	Tatobotys	albivenalis	Hampson	1897
〇	Spilomelinae	Steniini	Tatobotys	aurantialis	Hampson	1897
	Spilomelinae	Steniini	Tatobotys	biannulalis	(Walker)	1866
	Spilomelinae	Steniini	Tatobotys	janapalis	(Walker)	1859
〇	Spilomelinae	Trichaeini	Prophantis	adusta	Inoue	1986
〇	Spilomelinae	Udeini	Udea	exigualis	(Wileman)	1911
	Spilomelinae	Udeini	Udea	grisealis	Inoue, Yamanaka & Sasaki	2008
	Spilomelinae	Udeini	Udea	intermedia	Inoue, Yamanaka & Sasaki	2008
	Spilomelinae	Udeini	Udea	lugubralis	(Leech)	1889
	Spilomelinae	Udeini	Udea	lutealis	(Hübner)	[1809]
	Spilomelinae	Udeini	Udea	montensis	Mutuura	1954
〇	Spilomelinae	Udeini	Udea	nebulatalis	Inoue, Yamanaka & Sasaki	2008
	Spilomelinae	Udeini	Udea	orbicentralis	(Christoph)	1881
	Spilomelinae	Udeini	Udea	proximalis	Inoue, Yamanaka & Sasaki	2008
	Spilomelinae	Udeini	Udea	stationalis	Yamanaka	1988
	Spilomelinae	Udeini	Udea	stigmatalis	(Wileman)	1911
〇	Spilomelinae	Udeini	Udea	testacea	(Butler)	1879
	Spilomelinae	Udeini	Udea	tritalis	(Christoph)	1881
〇	Spilomelinae	Wurthini	Cotachena	alysoni	Whalley	1961	misidentification?
	Spilomelinae	Wurthini	Cotachena	brunnealis	Yamanaka	2001
	Spilomelinae	Wurthini	Cotachena	pubescens	(Warren)	1892
	Spilomelinae	Wurthini	Cotachena	taiwanalis	Yamanaka	2001
〇	Spilomelinae	Wurthini	Loxocorys	sericea	(Butler)	1879
〇	Spilomelinae	Wurthini	Pseudebulea	fentoni	Butler	1881
〇	Spilomelinae	Wurthini	Togabotys	fuscolineatalis	Yamanaka	1978
	Spilomelinae	unplaced	Cangetta	rectilinea	Moore	1886
	Spilomelinae	unplaced	Chabula	acamasalis	(Walker)	1859
〇	Spilomelinae	unplaced	Chabula	telphusalis	(Walker)	1859
	Spilomelinae	unplaced	Chabula	trivitralis	(Swinhoe)	1895
〇	Spilomelinae	unplaced	Daulia	afralis	Walker	1859	misidentification
〇	Spilomelinae	unplaced	Goniorhynchus	butyrosus	(Butler)	1879
	Spilomelinae	unplaced	Goniorhynchus	clausalis	(Christoph)	1881
〇	Spilomelinae	unplaced	Goniorhynchus	exemplaris	Hampson	1898
〇	Spilomelinae	unplaced	Hemopsis	dissipatalis	(Lederer)	1863	misidentification
	Spilomelinae	unplaced	Hemopsis	quinquigera	(Moore)	1888
〇	Spilomelinae	unplaced	Lipararchis	tranquillalis	(Lederer)	1863
〇	Spilomelinae	unplaced	Nacoleia	charesalis	(Walker)	1859	misplaced in Nacoleia
〇	Spilomelinae	unplaced	Nacoleia	commixta	(Butler)	1879
	Spilomelinae	unplaced	Nacoleia	fumidalis	(Leech)	1889
	Spilomelinae	unplaced	Nacoleia	gressitti	Inoue	1996
〇	Spilomelinae	unplaced	Nacoleia	inouei	Yamanaka	1980
〇	Spilomelinae	unplaced	Nacoleia	satsumalis	South	1901
〇	Spilomelinae	unplaced	Nacoleia	sibirialis	(Millière)	1879
〇	Spilomelinae	unplaced	Nacoleia	tampiusalis	(Walker)	1859
〇	Spilomelinae	unplaced	Piletocera	aegimiusalis	(Walker)	1859
〇	Spilomelinae	unplaced	Piletocera	sodalis	(Leech)	1889
〇	Spilomelinae	unplaced	Preneopogon	catenalis	(Wileman)	1911
	Spilomelinae	unplaced	Prionopaltis	consocia	Warren	1892
	Spilomelinae	unplaced	Pycnarmon	cribrata	(Fabricius)	1794
〇	Spilomelinae	unplaced	Pycnarmon	lactiferalis	(Walker)	1859
	Spilomelinae	unplaced	Pycnarmon	meritalis	(Walker)	1859
〇	Spilomelinae	unplaced	Pycnarmon	pantherata	(Butler)	1878	misplaced in Pycnarmon
〇	Spilomelinae	unplaced	Rehimena	surusalis	(Walker)	1859
	Spilomelinae	unplaced	Rehimena	variegata	Inoue	1996
	Spilomelinae	unplaced	Syllepte	cissalis	Yamanaka	1987	misplaced in Syllepte
〇	Spilomelinae	unplaced	Syllepte	fuscoinvalidalis	Yamanaka	1959	misplaced in Syllepte
〇	Spilomelinae	unplaced	Syllepte	fuscomarginalis	(Leech)	1889	misplaced in Syllepte
〇	Spilomelinae	unplaced	Syllepte	invalidalis	(South)	1901	misplaced in Syllepte
〇	Spilomelinae	unplaced	Syllepte	pallidinotalis	(Hampson)	1912	misplaced in Syllepte
〇	Spilomelinae	unplaced	Syllepte	segnalis	(Leech)	1889	misplaced in Syllepte
	Spilomelinae	unplaced	Syllepte	sp. of Doi, 2005
	Spilomelinae	unplaced	Syllepte	sp. of Sasaki, 2004
〇	Spilomelinae	unplaced	Syllepte	taiwanalis	(Shibuya)	1928	misplaced in Syllepte
	Spilomelinae	unplaced	Tylostega	tylostegalis	(Hampson)	1900
	Spilomelinae	unplaced	Gen.	sp. of Sasaki, 2004
